# Supplementary material
Source: bioRxiv or medRxiv preprint supplement (https://www.medrxiv.org/highwire/filestream/72947/field_highwire_adjunct_files/0/2020.01.06.20016683-1.pdf)
Supplement: Supplementary file [file 2020.01.06.20016683-1.pdf]

### Supplemental Figure 1

#### Fluorescence-activated cell sorting (FACS) of CSF-CTCs from LUAD-LM patient samples.

CTCs lack CD45 (APC-A) expression and its FSC-H is larger than normal leukocytes. Calcein Blue AM (UltraViolet-A excitation) was used to select live cells.

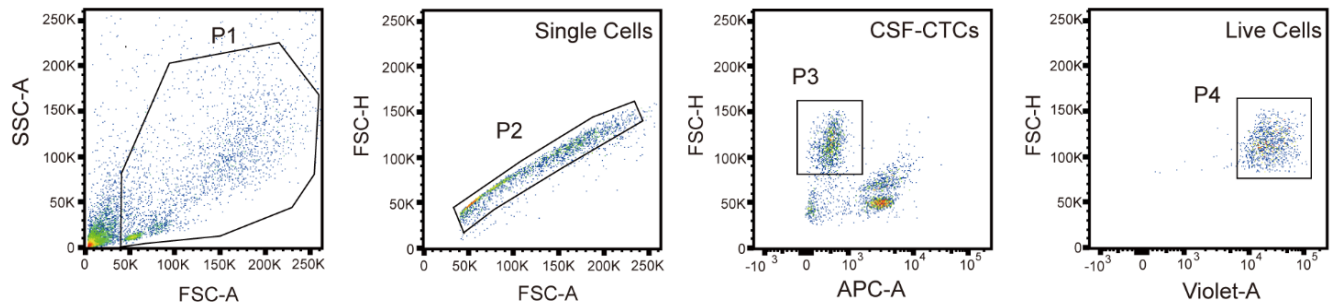

## Supplemental Figure 2

**t-SNE plot of LUAD-LM patients CSF-CTCs single-cell transcriptome profiles.** (A) t-SNE plots of CSF-CTC clustering of five LUAD-LM CSF samples with a minimum number of covered genes of 1,000. (B) Three covered genes number groups (1000-1999, 2000-2999, and 3000-3999) are highlighted for each cell in the t-SNE plot in Supplemental Figure 2A. The clustering pattern is not driven by the number of covered genes. (C) t-SNE clustering plot of patient P3 with normal CSF samples (N1, N2 and N3) and LUAD-LM CSF samples (P1, P2, P4, P6 and P7). LUAD-LM patient P3 CSF sample was processed following the protocol in Figure 1A without CD45 negative cell selection. Candidate CTCs were manually selected based on cell morphology only. Cell identity analysis revealed that all cells collected from P3 CSF sample are monocytes.

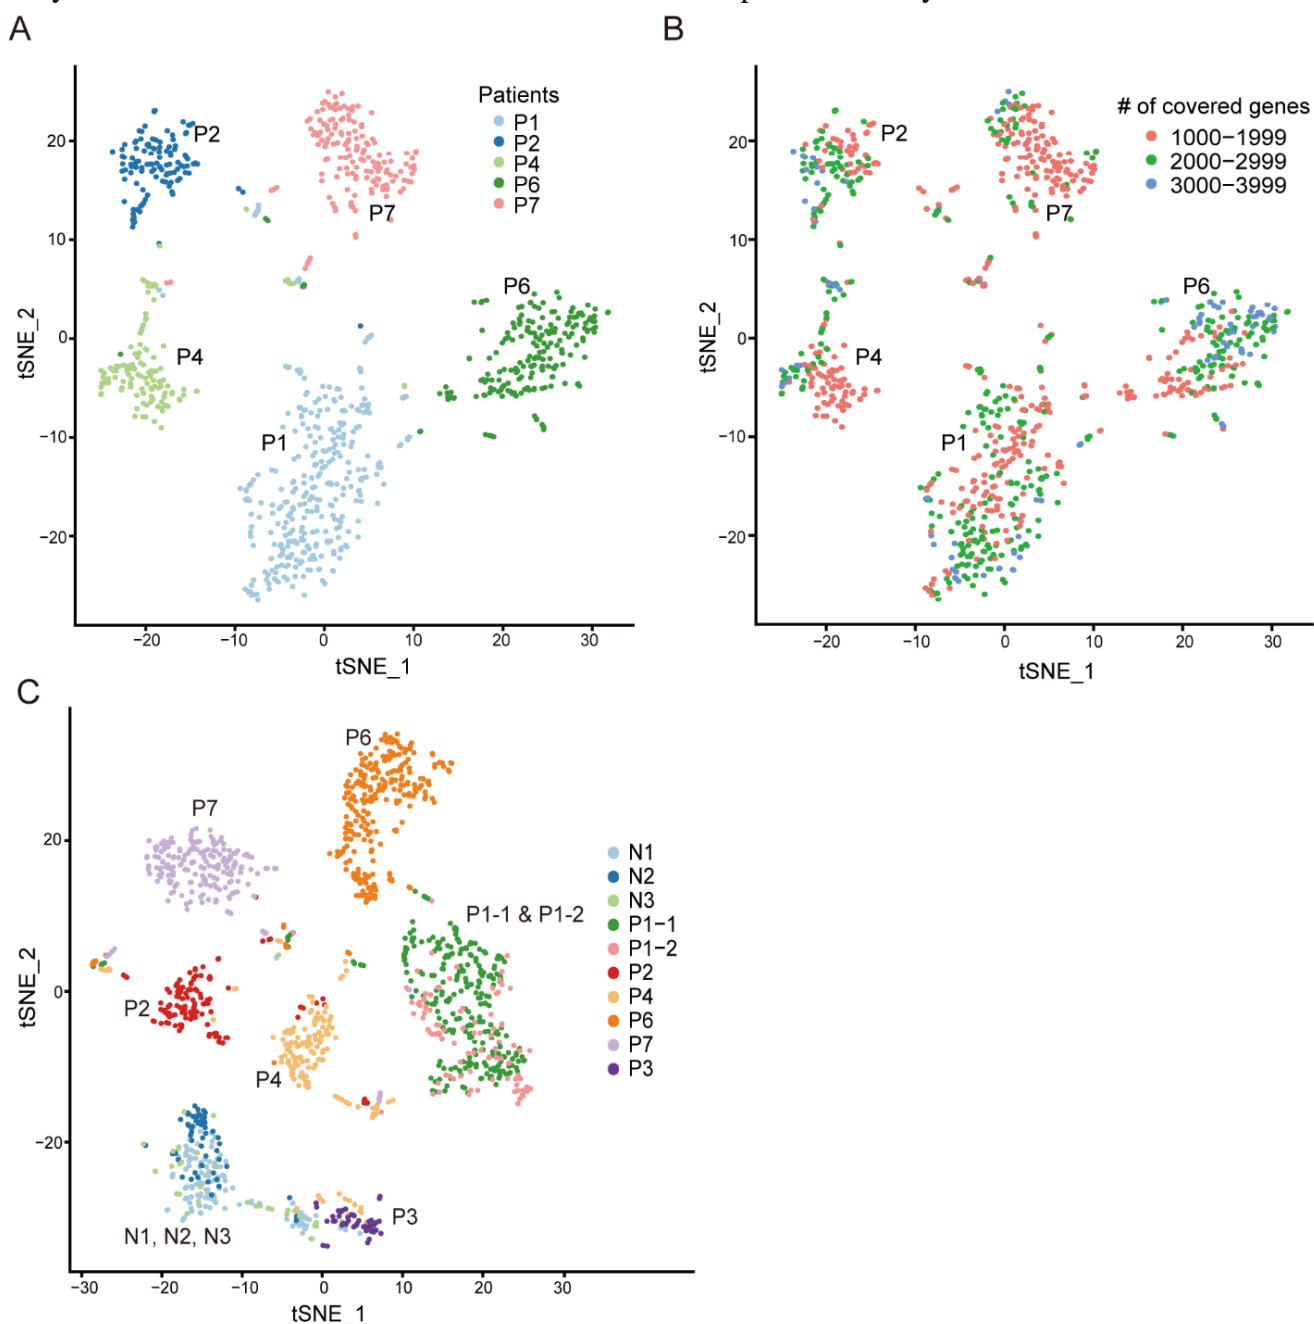

### Supplementary Figure 3

**Characterization of the single-cell gene expression profile across all cells in CSF samples for selected marker genes.** Feature plots demonstrating the expression of the following selected genes on the t-SNE plot (Figure 2A). Scaled expression levels are depicted using a red gradient (grey denotes lack of expression). Immune marker genes: *PTPRC*, *CD2*, *CD3D*, *CD3E*, *CD3G*, *CD14*, *CD68* and *CD163*. Lung associated genes: *SFTPA1*, *SFTPA2*, *SFTPB* and *NAPSA*. Epithelial marker genes: *EPCAM*, *CDH1*, *KRT7*, *KRT8*, *KRT17*, *KRT18*, *KRT19* and *MUC1*. Cell cycle associated genes: *CCND1* and *TOP2A*.

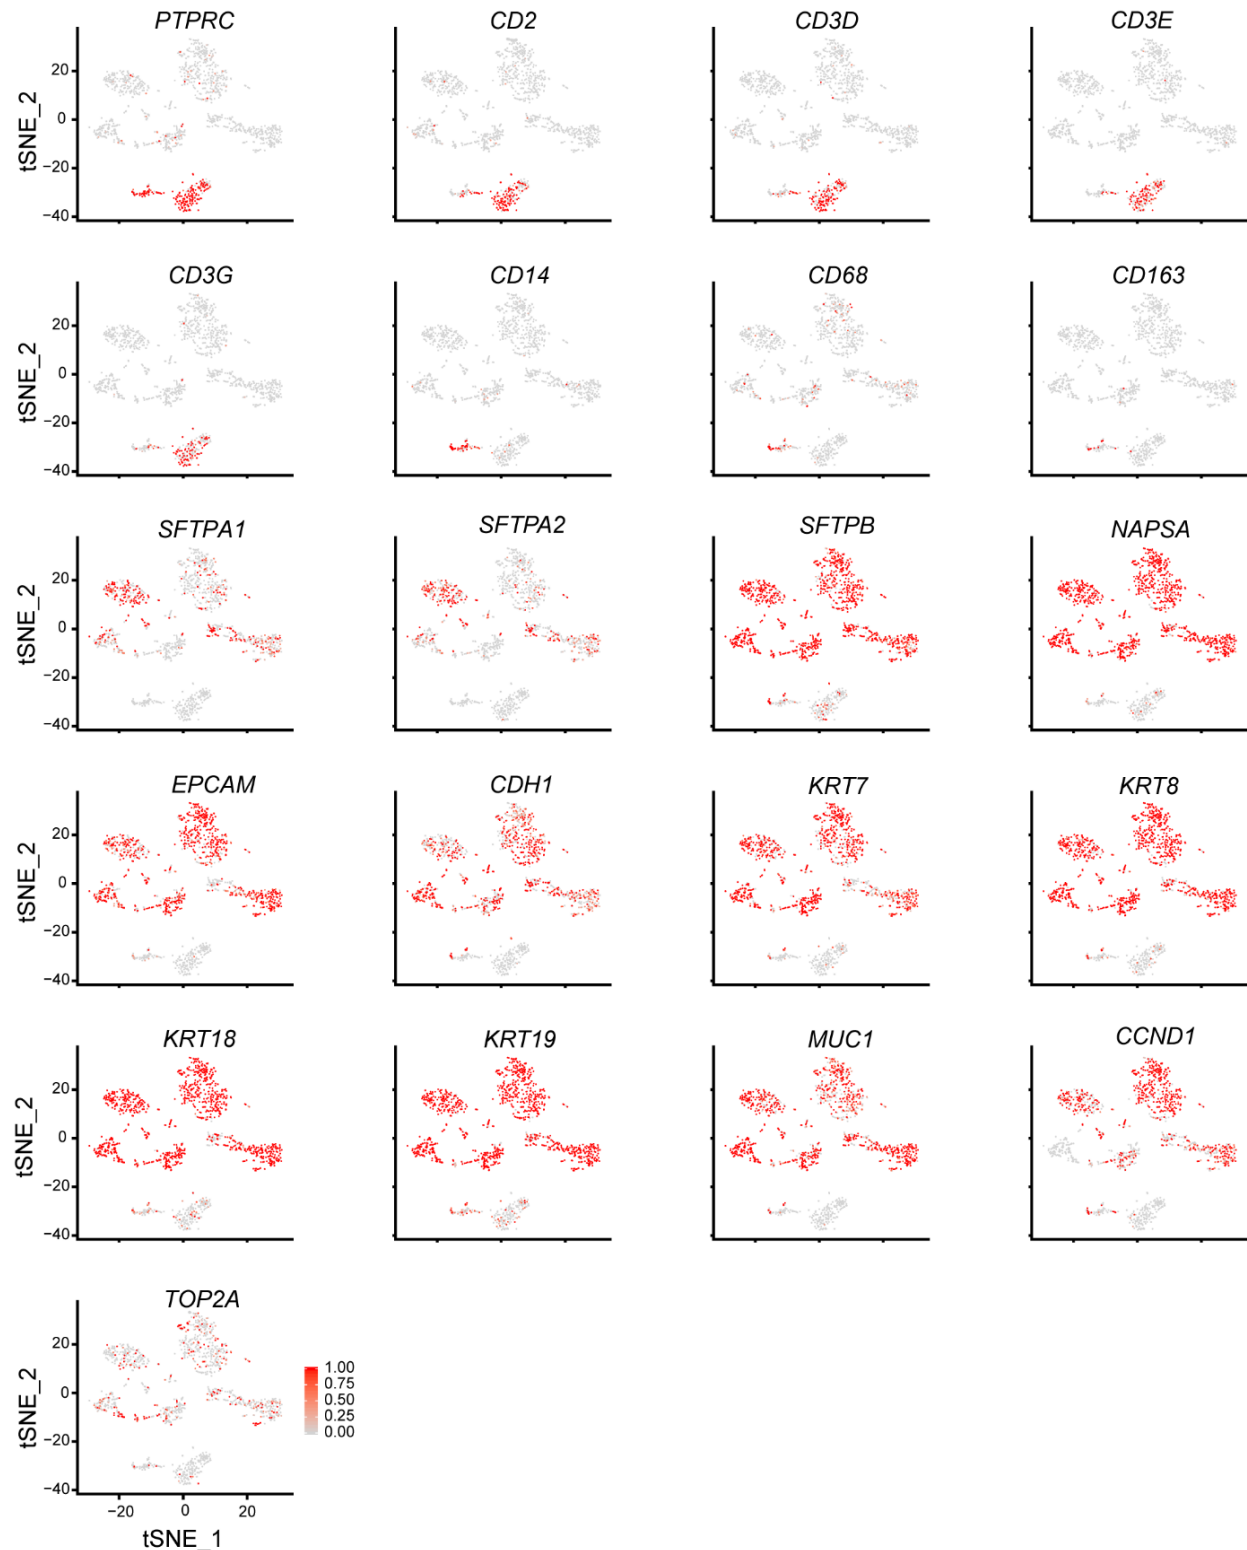

## Supplementary Figure 4

**Gene expression profile of cell cycle genes, CSC genes and genes related to partial EMT in CSF-CTCs.** (A) Estimation of the cell cycle state of individual CTCs (dots) in P2, P6, P7, H358 cell line and PT45 based on the relative expression of G1/S (x axis) and G2/M (y axis) gene sets. Cells are colored as in Figure 4A. (B) Feature plots demonstrating the expression of CSC markers (*PROM1*, *CD44*, *ALDH1A1*, *ALDH1A3* and *ALDH3A1*) on the t-SNE plot (Supplementary Figure 2A). Scaled expression levels are depicted using a red gradient (grey stands for lack of expression). (C) Unsupervised clustering based on GSVA score (*top*) and average normalized expression level (*bottom*) of epithelial gene set, mesenchymal/CSC gene set and extracellular matrix gene set in CSF-CTCs from patient P2, P6 and P7. (D) Scatterplot of average expression value of epithelial genes on the x-axis and mesenchymal genes on the y-axis for every LUAD-LM CSF-CTCs. The red cells have high expression of mesenchymal genes with low expression of epithelial genes. (E) Scatterplot of average expression value of mesenchymal genes on the x-axis and *CD44* on the y-axis for every LUAD-LM CSF-CTCs. The gene sets used in Extended Data Fig. 4c-e are the same as in Figure 4C.

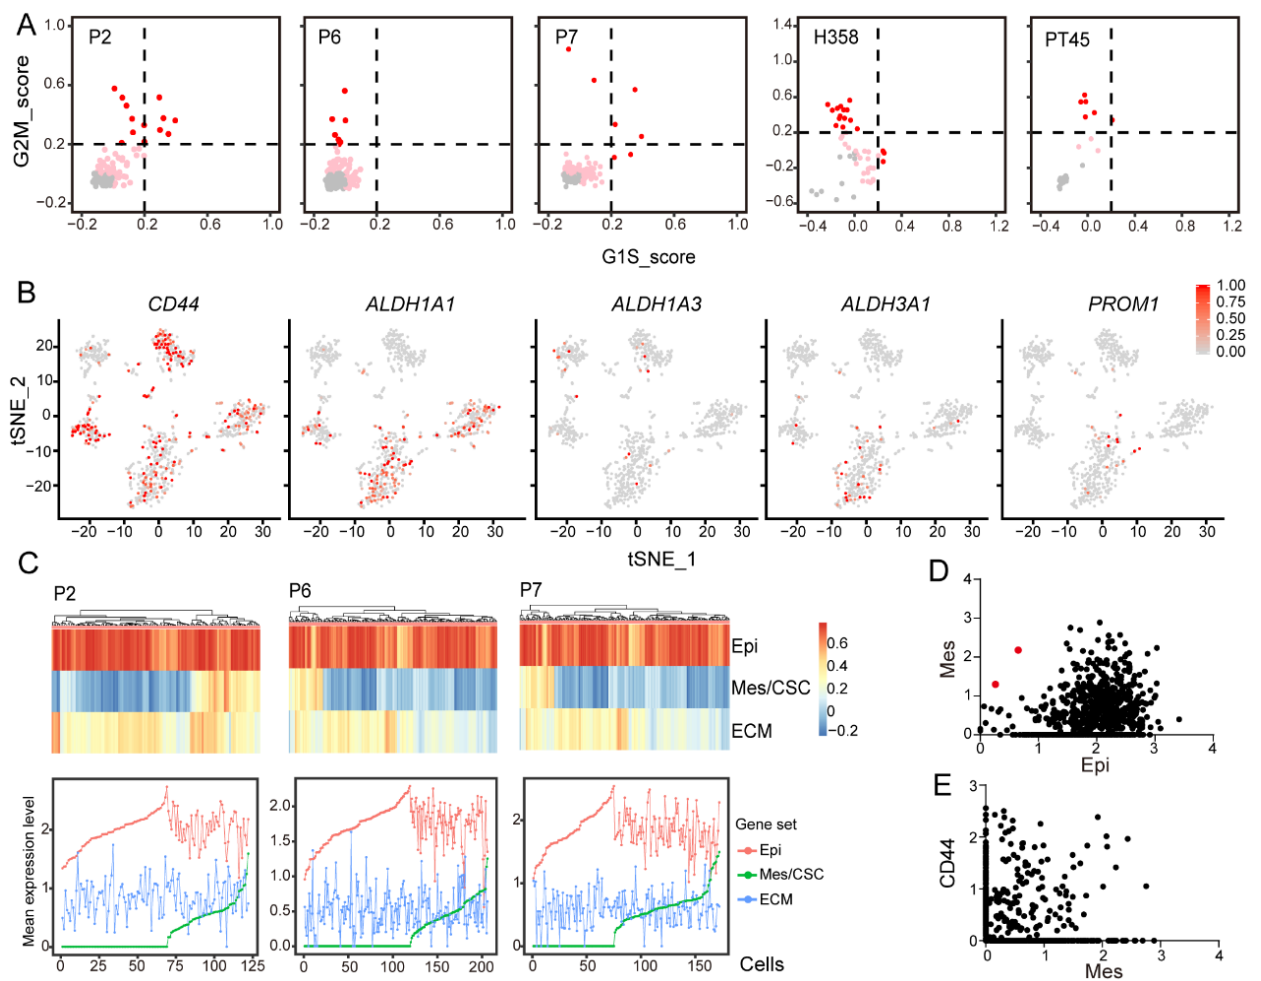

### Supplementary Figure 5

**Gene expression profile of genes related to cell cycle, partial EMT and CSC in P8 CSF-CTCs.** (A) Cell cycle state of individual CSF-CTCs (dots) inferred from relative expression of G1/S (x-axis) and G2/M (y-axis) gene sets in P8-1 and P8-2 samples. (B) Average normalized expression level (y-axis) of epithelial genes (*EPCAM*, *KRT18*, *KRT19*, *KRT7*, *KRT8*, *MUC1*), mesenchymal genes (*VIM*, *FN1*) and CSC genes (*PROM1*, *CD44*) in P8 cells (x-axis).

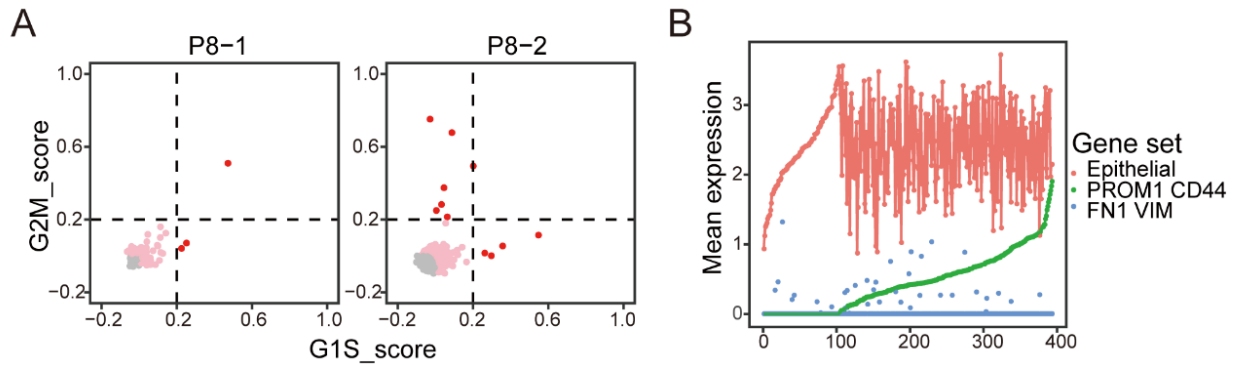

**Supplementary Table 1. Clinical information and cell selection conditions for CSF and blood samples.**

| Patient ID/info      | Age | Gender | Cancer diagnosis time | LM diagnosis time | Metastatic tumor location in LM by MRI    | Sample collection date | Markers for FACS sorting              | Number of cells sequenced |
|----------------------|-----|--------|-----------------------|-------------------|-------------------------------------------|------------------------|---------------------------------------|---------------------------|
| <b>P1 LUAD</b>       | 36  | Male   | 11/2017               | 01/2018           | Left frontal lobe,<br>Right parietal lobe | 11/1/2018<br>(P1-1)    | Calcein<br>Blue AM+<br>CD45-          | 168                       |
|                      |     |        |                       |                   |                                           | 1/7/2019<br>(P1-2)     |                                       | 360                       |
| <b>P2 LUAD</b>       | 62  | Female | Unknown               | 12/2018           | Bilateral temporal lobe                   | 12/17/2018             | Calcein<br>Blue AM+<br>CD45-          | 192                       |
| <b>P4 LUAD</b>       | 65  | Female | 11/2017               | 02/2019           | Cerebellum                                | 3/1/2019               | Calcein<br>Blue AM+<br>CD45-          | 288                       |
| <b>P6 LUAD</b>       | 55  | Male   | 12/2012               | 03/2019           | Bilateral temporal lobe                   | 3/8/2019               | Calcein<br>Blue AM+<br>CD45-          | 480                       |
| <b>P7 LUAD</b>       | 60  | Male   | 07/2017               | 05/2019           | /                                         | 5/10/2019              | Calcein<br>Blue AM+<br>CD45-          | 288                       |
| <b>P3 LUAD</b>       | 49  | Male   | 02/2017               | 02/2018           | Right temporal lobe                       | 3/3/2019               | Calcein<br>Blue AM+                   | 96                        |
| <b>P8 CUP</b>        | 49  | Male   | 12/2017               | 05/2018           | Cerebellum and Cerebral hemisphere        | 1/14/2019<br>(P8-1)    | Calcein<br>Blue AM+<br>CD45           | 480                       |
|                      |     |        |                       |                   |                                           | 6/21/2019<br>(P8-1)    |                                       | 816                       |
| <b>N1 control</b>    | 40  | Male   | N/A                   | N/A               | N/A                                       | 10/8/2018              | Calcein<br>Blue AM+                   | 288                       |
| <b>N2 control</b>    | 35  | Female | N/A                   | N/A               | N/A                                       | 10/10/2018             | Calcein<br>Blue AM+                   | 240                       |
| <b>N3 control</b>    | 39  | Male   | N/A                   | N/A               | N/A                                       | 10/18/2018             | Calcein<br>Blue AM+                   | 96                        |
| <b>Blood-T cells</b> | 27  | Female | N/A                   | N/A               | N/A                                       | 1/25/2019              | Calcein<br>Blue AM+<br>CD45+<br>CD3+  | 168                       |
| <b>Blood-B cells</b> | 27  | Female | N/A                   | N/A               | N/A                                       | 1/25/2019              | Calcein<br>Blue AM+<br>CD45+<br>CD19+ | 168                       |

LUAD: lung adenocarcinoma; CUP: cancer of unknown primary site; LM: leptomeningeal metastases; FACS: fluorescence activating cell sorter; Calcein Blue AM: labeling dye for live cells selection; CD45: protein tyrosine phosphatase receptor type C, marker for leukocytes; CD19: marker for B cells; CD3: marker for T cells; N/A: Not applicable; “ / ”: no leptomeningeal enhancement shown by MRI.

**Supplementary Table 2. Summary of cell type identity of CSF samples in normal patients, blood-T cell and blood-B cell samples.**

| <b>Sample ID</b> | <b>Total filtered cells</b> | <b>T cells</b> | <b>B cells</b> | <b>Monocytes</b> |
|------------------|-----------------------------|----------------|----------------|------------------|
| N1               | 127                         | 105            |                | 22               |
| N2               | 53                          | 51             |                | 2                |
| N3               | 27                          | 14             |                | 13               |
| Blood-T          | 41                          | 41             |                |                  |
| Blood-B          | 41                          |                | 41             |                  |
| <b>Total</b>     | <b>289</b>                  | <b>211</b>     | <b>41</b>      | <b>37</b>        |

**Supplementary Table 3. Summary of sequenced reads and detected genes of CSF samples in patients, normal patients, blood T cell and blood-B cell samples.**

| <b>Sample ID</b> | <b># of sequencing reads</b> | <b># of filtered reads*</b> | <b># of uniquely mapped reads</b> | <b>Average # of uniquely mapped reads per cell</b> | <b>Total genes detected</b> | <b># of genes whose counts&gt;1000</b> |
|------------------|------------------------------|-----------------------------|-----------------------------------|----------------------------------------------------|-----------------------------|----------------------------------------|
| <b>P1-1</b>      | 58380064                     | 15206906                    | 6734715                           | 40088                                              | 11655                       | 436                                    |
| <b>P1-2</b>      | 237321692                    | 42055297                    | 16346993                          | 45408                                              | 13813                       | 1412                                   |
| <b>P2</b>        | 147219734                    | 33865056                    | 12336410                          | 64252                                              | 12893                       | 652                                    |
| <b>P4</b>        | 350537537                    | 15235749                    | 6579460                           | 22845                                              | 13518                       | 1203                                   |
| <b>P6</b>        | 302888314                    | 123455881                   | 47199598                          | 98332                                              | 14262                       | 1692                                   |
| <b>P7</b>        | 94506564                     | 24521678                    | 7850335                           | 27258                                              | 12170                       | 371                                    |
| <b>P3</b>        | 89980565                     | 6222803                     | 2340870                           | 24384                                              | 9243                        | 233                                    |
| <b>P8-1</b>      | 297958378                    | 74043518                    | 35977243                          | 74953                                              | 13340                       | 2012                                   |
| <b>P8-2</b>      | 329258208                    | 73341499                    | 27047520                          | 70436                                              | 13340                       | 1332                                   |
| <b>N1</b>        | 125071290                    | 27453376                    | 6834185                           | 23730                                              | 13592                       | 308                                    |
| <b>N2</b>        | 224306614                    | 49201160                    | 5036090                           | 26230                                              | 10944                       | 236                                    |
| <b>N3</b>        | 105595344                    | 12538866                    | 3107257                           | 32367                                              | 10101                       | 90                                     |
| <b>Blood-T</b>   | 91515818                     | 22523435                    | 9798201                           | 58323                                              | 7522                        | 428                                    |
| <b>Blood-B</b>   | 104966890                    | 25259710                    | 11184723                          | 66576                                              | 9084                        | 484                                    |

\*: *filtered reads*: demultiplex combined sequenced reads via barcodes; removed poly-T bases in forward reads using manual scripts; for each read, extracted barcode and expand read name with it; remove low-quality bases and reads using *Trim galore!* setting `-q=25 --phred33 --stringency=3`. *mapping parameters*: reference genome is hg38; default parameters of STAR alignment.



**Supplementary Table 4. Summary of disease relevant mutations detected in CSF cell free DNA (CSF-cfDNA) by next-generation sequencing.**

| <b>Patient ID</b> | <b>Sample collection date</b> | <b>EGFR</b>                    | <b>TP53</b>             | <b>ALK</b>               | <b>KRAS(P21)</b>                                 |
|-------------------|-------------------------------|--------------------------------|-------------------------|--------------------------|--------------------------------------------------|
| P1                | 20180122                      | p.Glu746_Ala750del<br>(25.34%) | p.Trp53Ter<br>(85.47%)  | p.Arg1192Trp<br>(82.66%) | p.Gln61Leu<br>(0.13%),<br>p.Gly138Arg<br>(0.20%) |
| P2                | N/A                           |                                |                         |                          |                                                  |
| P4                | 20190307                      | p.Leu858Arg<br>(16.09%)        | p.Arg248Gln<br>(44.72%) |                          |                                                  |
| P6                | N/A                           |                                |                         |                          |                                                  |
| P7                | 20190510                      |                                | p.Asp281Tyr<br>(89.72%) |                          |                                                  |

p: protein; Numbers in brackets indicate mutation frequencies.

**Supplementary Table 5. List of 25 top candidate patient P8 cluster defining genes.**

| <b>gene</b>     | <b>average log<sub>2</sub><br/>(FC)</b> | <b>adjusted <i>P</i>-<br/>value</b> | <b>pct in P8</b> | <b>pct in other<br/>patients</b> | <b>pct diff</b> |
|-----------------|-----------------------------------------|-------------------------------------|------------------|----------------------------------|-----------------|
| <i>PIP</i>      | 7.496                                   | 0.000                               | 0.945            | 0.050                            | 0.895           |
| <i>ANKRD30A</i> | 3.423                                   | 0.000                               | 0.794            | 0.007                            | 0.787           |
| <i>SERHL2</i>   | 2.550                                   | 0.000                               | 0.699            | 0.034                            | 0.665           |
| <i>PNMT</i>     | 2.620                                   | 0.000                               | 0.606            | 0.010                            | 0.596           |
| <i>SRARP</i>    | 1.415                                   | 0.000                               | 0.554            | 0.000                            | 0.554           |
| <i>UGT2B11</i>  | 2.201                                   | 0.000                               | 0.400            | 0.004                            | 0.396           |
| <i>MEIS1</i>    | 1.281                                   | 0.000                               | 0.400            | 0.025                            | 0.375           |
| <i>TRPS1</i>    | 0.779                                   | 0.000                               | 0.386            | 0.025                            | 0.361           |
| <i>CKMT1B</i>   | 0.749                                   | 0.000                               | 0.400            | 0.042                            | 0.358           |
| <i>KMO</i>      | 0.688                                   | 0.000                               | 0.335            | 0.015                            | 0.320           |
| <i>MUC5B</i>    | 1.478                                   | 0.000                               | 0.313            | 0.026                            | 0.287           |
| <i>UGT2B28</i>  | 0.784                                   | 0.000                               | 0.279            | 0.000                            | 0.279           |
| <i>CYP4Z1</i>   | 0.705                                   | 0.000                               | 0.281            | 0.002                            | 0.279           |
| <i>TFF3</i>     | 2.027                                   | 0.000                               | 0.309            | 0.031                            | 0.278           |
| <i>KRT81</i>    | 2.123                                   | 0.000                               | 0.287            | 0.009                            | 0.278           |
| <i>HSD17B2</i>  | 0.587                                   | 0.000                               | 0.212            | 0.006                            | 0.206           |
| <i>HPX</i>      | 0.603                                   | 0.000                               | 0.216            | 0.021                            | 0.195           |
| <i>CCDC160</i>  | 0.635                                   | 0.000                               | 0.196            | 0.003                            | 0.193           |
| <i>MOV10L1</i>  | 0.585                                   | 0.000                               | 0.194            | 0.020                            | 0.174           |
| <i>MUC5AC</i>   | 0.928                                   | 0.000                               | 0.174            | 0.003                            | 0.171           |
| <i>ZCCHC2</i>   | 0.906                                   | 0.000                               | 0.172            | 0.031                            | 0.141           |
| <i>EFHD1</i>    | 0.700                                   | 0.000                               | 0.139            | 0.025                            | 0.114           |
| <i>DCD</i>      | 3.152                                   | 0.000                               | 0.111            | 0.000                            | 0.111           |
| <i>IGKC</i>     | 2.774                                   | 0.000                               | 0.121            | 0.041                            | 0.080           |
| <i>R3HCC1L</i>  | 0.651                                   | 0.019                               | 0.111            | 0.049                            | 0.062           |

Patient P8 cluster defining genes were selected compared to other CSF samples (Figure 5i) by fold change > 1.5, pct in P8 ≤ 0.05 and adjusted *P*-value < 0.05; pct in P8: the percentage of cells where the gene is detected in P8 CSF samples; pct in other patients: the percentage of cells where the gene is detected in other CSF samples; pct diff: the pct difference in P8 compared to other CSF samples (P8 minus others).

P8 cluster defining genes with pct dff > 0.2 are shown in Fig. 6b.

**Supplementary Table 6. List of patient P8 cluster defining genes with significant biased expression during tumor progression between P8-1 and P8-2 samples**

| gene            | avg log <sub>2</sub> FC | adjusted P-value | pct in P8 | pct in others | pct in P8-1 | pct in P8-2 | adjusted P-value | avg log <sub>2</sub> FC | pct diff |
|-----------------|-------------------------|------------------|-----------|---------------|-------------|-------------|------------------|-------------------------|----------|
| <i>GLYATL2</i>  | 1.219                   | 0.000            | 0.196     | 0.011         | 0.486       | 0.082       | 0.000            | 1.708                   | 0.404    |
| <i>KLK5</i>     | 0.853                   | 0.000            | 0.109     | 0.001         | 0.297       | 0.031       | 0.000            | 1.657                   | 0.266    |
| <i>ZG16B</i>    | 1.435                   | 0.000            | 0.426     | 0.003         | 0.662       | 0.386       | 0.000            | 1.093                   | 0.276    |
| <i>S100A8</i>   | 2.488                   | 0.000            | 0.293     | 0.017         | 0.568       | 0.171       | 0.000            | 0.639                   | 0.397    |
| <i>S100A7</i>   | 2.382                   | 0.000            | 0.214     | 0.004         | 0.493       | 0.109       | 0.000            | 0.830                   | 0.384    |
| <i>MSMB</i>     | 0.855                   | 0.000            | 0.188     | 0.005         | 0.372       | 0.126       | 0.000            | 1.021                   | 0.246    |
| <i>C15orf48</i> | 0.603                   | 0.000            | 0.188     | 0.023         | 0.385       | 0.113       | 0.000            | 0.915                   | 0.272    |
| <i>CALML5</i>   | 0.792                   | 0.000            | 0.158     | 0.004         | 0.351       | 0.085       | 0.000            | 1.090                   | 0.266    |
| <i>TCN1</i>     | 0.787                   | 0.000            | 0.115     | 0.003         | 0.264       | 0.055       | 0.000            | 1.102                   | 0.209    |
| <i>SPINK8</i>   | 3.245                   | 0.000            | 0.703     | 0.002         | 0.486       | 0.918       | 0.000            | -2.022                  | -0.432   |
| <i>OLFM4</i>    | 1.706                   | 0.000            | 0.481     | 0.000         | 0.122       | 0.741       | 0.000            | -2.002                  | -0.619   |
| <i>CRYAB</i>    | 2.418                   | 0.000            | 0.626     | 0.030         | 0.486       | 0.792       | 0.000            | -0.939                  | -0.306   |
| <i>TFAP2B</i>   | 1.613                   | 0.000            | 0.576     | 0.001         | 0.466       | 0.727       | 0.002            | -0.449                  | -0.261   |
| <i>KCNMA1</i>   | 0.859                   | 0.000            | 0.337     | 0.001         | 0.182       | 0.468       | 0.000            | -0.546                  | -0.286   |
| <i>TFF1</i>     | 1.561                   | 0.000            | 0.267     | 0.001         | 0.149       | 0.372       | 0.009            | -0.602                  | -0.223   |

Patient P8 cluster defining genes were selected compared to other CSF clusters (Figure 5i) by fold change > 1.5, pct in P8 ≤ 0.05 and adjusted P-value < 0.05; pct in P8: the percentage of cells where the gene is detected in P8 CSF samples; pct in others: the percentage of cells where the gene is detected in other CSF samples.

The 15 biased expression genes in P8-1 or P8-2 of P8 cluster defining genes were selected by pct in P8-1 or P8-2 < 0.5, |pct diff| > 0.2 and adjust P-value; pct in P8-1, the percentage of cells where the gene is detected in P8-1 CTCs; pct in P8-2, the percentage of cells where the gene is detected in P8-2 CTCs; pct diff, the different percentage of cells where the gene is detected in P8-1 compared to P8-2 (P8-1 minus P8-2).

P8 cluster defining genes with expression biased in P8-1 CTCs (9 genes) are shown in Fig. 6d, and with expression biased in P8-2 CTCs (6 genes) are shown in Fig. 6e.
